# Supplementary material
Source: publisher figshare collection journal article supplement (https://acs.figshare.com/ndownloader/files/5140183)
Supplement: Supplementary file 1 [file 5140183]

# **Total Synthesis and Elucidation of Absolute Configuration of the Diterpene Tonantzitlolone**

**Christian Jasper, Rüdiger Wittenberg, Monika Quitschalle, Jasmin Jakupovic, Andreas  
Kirschning\***

**SUPPORTING INFORMATION - EXPERIMENTAL**

## Supporting Information

**General Methods.**  $^1\text{H}$  NMR,  $^{13}\text{C}$  NMR and  $^1\text{H}$ ,  $^{13}\text{C}$ -COSY as well as NOESY spectra were measured on Avance 200/DPX (Bruker) with 200 MHz (50 MHz), Avance 400/DPX (Bruker) 400 MHz (100 MHz) and Avance 500/DRX (Bruker) respectively, using tetramethylsilane as the internal standard. If not otherwise noted,  $\text{CDCl}_3$  is the solvent for all NMR experiments. Multiplicities are described using the following abbreviations: s = singlet, d = doublet, t = triplet, q = quartet, m = multiplet, br = broad. Chemical shift values of  $^{13}\text{C}$  NMR spectra are reported as values in ppm relative to residual  $\text{CHCl}_3$  (77 ppm) or  $\text{CD}_3\text{OD}$  (49) as internal standards. The multiplicities refer to the resonances in the off-resonance spectra and were elucidated using the distortionless enhancement by polarisation transfer (DEPT) spectral editing technique, with secondary pulses at  $90^\circ$  and  $135^\circ$ . Mass spectra were recorded on a type LCT-spectrometer (Micromass) and on a type VG autospec (Micromass). Optical rotations  $[\alpha]$  were collected on a Polarimeter 341 (Perkin Elmer) at a wavelength of 589 nm and are given in  $10^{-1} \text{ deg cm}^2 \text{ g}^{-1}$ . All solvents used were of reagent grade and were further dried. Reactions were monitored by thin layer chromatography (tlc) on silica gel 60 F<sup>254</sup> (E. Merck, Darmstadt) and spots were detected either by UV-absorption or by charring with  $\text{H}_2\text{SO}_4$ /4-methoxybenzaldehyde in methanol. Preparative column chromatography was performed on silica gel 60 (E. Merck, Darmstadt).

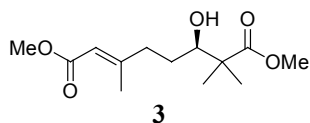

**(E,6R)-Hydroxy-3,7,7-trimethyl-oct-2-enedioic acid dimethylester 3.** A flame-dried 3-neck 500 mL round bottom flask equipped with a pressure equalized dropping funnel was charged with *N*-tosylated *L*-valin (7.85 g, 28.9 mmol) and 290 mL of anhydrous  $\text{CH}_2\text{Cl}_2$ . A borane-THF complex solution (28.9 mL, 1 M THF) was added dropwise and the solution was allowed to stir for additional 20 minutes. Then the reaction mixture was cooled to  $-78^\circ\text{C}$ , and aldehyde **5** (4.52 g, 28.9 mmol) in 30 mL of dry  $\text{CH}_2\text{Cl}_2$  was introduced, followed by ketene acetal **6** (7.56 g, 43.4 mmol) in 30 mL of dry  $\text{CH}_2\text{Cl}_2$ . After complete addition the solution was warmed slowly to  $-30^\circ\text{C}$  and *cautiously* terminated with 50 mL of phosphate buffer solution (pH = 7). The mixture was warmed to room temperature and the layers were separated. The aqueous layer was extracted with  $\text{CH}_2\text{Cl}_2$  (3 x 50 mL), and the combined organic solutions were dried over  $\text{MgSO}_4$  and concentrated under reduced pressure. The residue was treated with hexanes (100 mL) and the solution was filtered to remove the amino acid. The filtrate was concentrated under reduced pressure and taken up in MeOH (50 mL), and a catalytic amount of acetyl chloride was added to cleave the silyl ether. After 15 minutes the solution was concentrated under reduced pressure again and purified by flash chromatography (hexanes/EtOAc, 4:1) to furnish the desired aldol product, 5.45 g (21.1 mmol, 73%), as an oil.

Data are: TLC  $R_f$  = 0.17 (hexanes/EtOAc, 4:1);  $[\alpha]_D^{20}$  =  $+20.3^\circ$  (c 1,  $\text{CHCl}_3$ );  $^1\text{H}$  NMR (400 MHz,  $\text{CDCl}_3$ )  $\delta$  5.67 (dt,  $J$  = 3.6, 1.2 Hz, 1 H), 3.67 (s, 3 H), 3.65 (s, 3 H), 3.54 (ddd,  $J$  = 10.8, 6.9, 2.0 Hz, 1 H), 2.69 (d,  $J$  = 6.9 Hz, 1 H), 2.43 (dddd,  $J$  = 14.6, 9.7, 4.8, 1.2 Hz, 1 H), 2.17 (dddd,  $J$  = 14.6, 9.6, 6.7, 1.0 Hz, 1 H), 2.13 (d,  $J$  = 1.2 Hz, 3 H), 1.58 (dddd,  $J$  = 13.7, 10.8, 9.7, 6.7, Hz, 1 H), 1.42 (dddd,  $J$  = 13.7, 9.6, 4.8, 2.0 Hz, 1 H), 1.16 (s, 3 H), 1.15 (s, 3 H);  $^{13}\text{C}$  NMR (100 MHz,  $\text{CDCl}_3$ )  $\delta$  178.0, 167.1, 159.9, 115.4, 75.8, 51.9, 50.7, 47.0, 37.7, 29.3, 22.2, 20.4, 18.8; IR (neat)  $\nu$  3507, 2979, 2951, 1715, 1648, 1435, 1272, 1223, 1146, 1076, 1023, 860; MS (EI)  $m/z$  (%) 258 ( $\text{M}^+$ , 28), 243 (25), 226 (33), 211 (38), 195 (55), 176 (46), 157 (59), 144 (65), 125 (100), 102 (100), 97 (81), 87 (67), 70 (98); HRMS (EI) found 258.1466  $\text{M}^+$ , calcd 258.1467 for  $\text{C}_{13}\text{H}_{22}\text{O}_5$ .

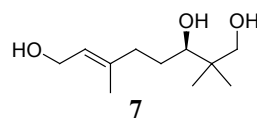

**(E,3R)-2,6,6-Trimethyl-oct-6-ene-1,3,8-triol 7.** A flame-dried 500 mL round bottom flask equipped with a pressure equalized dropping funnel was charged with  $\text{LiAlH}_4$  (4 g, 105 mmol) and 210 mL of anhydrous  $\text{Et}_2\text{O}$ . The reaction mixture was cooled to  $0^\circ\text{C}$ , and diester **3** (5.45 g, 21.1 mmol) in 20 mL of anhydrous  $\text{Et}_2\text{O}$  was added dropwise. The mixture was warmed to room temperature in the cold bath and stirred over night. Then  $\text{H}_2\text{O}$  (4 mL) was *cautiously* added, followed by 4 N aqueous NaOH (4 mL) and  $\text{H}_2\text{O}$  (8 mL). After 1 h  $\text{Na}_2\text{SO}_4$  was added and the mixture was filtered. The residue was washed with EtOAc and the combined organic solutions were concentrated under reduced pressure to deliver the triol, 4.27 g (21.1 mmol, >99%), as an oil.

Data are: tlc  $R_f$  = 0.17 (EtOAc);  $[\alpha]_D^{20}$  =  $+23.6^\circ$  (c 1,  $\text{CHCl}_3$ );  $^1\text{H}$  NMR (400 MHz,  $\text{CDCl}_3$ )  $\delta$  5.43-5.46 (m, 1 H), 4.16-4.12 (m, 2 H), 3.57 (d,  $J$  = 10.8 Hz, 1 H), 3.44 (dd,  $J$  = 10.6, 1.7 Hz, 1 H), 3.39 (d,  $J$  = 10.8 Hz, 1 H), 2.27 (ddd,  $J$  = 14.0, 8.6, 5.3 Hz, 1 H), 2.11-2.07 (m, 1 H), 1.67 (bs, 3 H), 1.66-1.61 (m, 1 H), 1.46 (dddd,  $J$  = 13.8, 10.6, 8.6, 5.3, Hz, 1 H), 0.89 (s, 3 H), 0.85 (s, 3 H);  $^{13}\text{C}$  NMR (100 MHz,  $\text{CDCl}_3$ )  $\delta$  139.3, 123.9, 77.9, 71.9, 59.1, 38.5, 36.4, 29.2, 22.5, 18.8, 16.1; IR (neat)  $\nu$  3317, 2954, 2873, 1739, 1442, 1381, 1230, 1034, 1000, 932; MS (EI)  $m/z$  (%) 202 ( $\text{M}^+$ , 1), 184 (10), 169 (17), 151 (19), 131 (36), 129 (27), 116 (66), 95 (49), 84 (100), 69 (78); HRMS (EI) found 202.1554  $\text{M}^+$ , calcd 202.1569 for  $\text{C}_{11}\text{H}_{22}\text{O}_3$ .

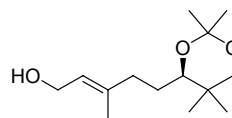

(no compound number was assigned in the manuscript)  
**(E,R)-Allyl alcohol.** A 250 mL round bottom flask was charged with triol **7** (6.57 g, 32.5 mmol) and 70 mL of anhydrous DMF. 2,2-Dimethoxy propane (20 mL) was added at room temperature, followed by a catalytic amount of *p*TsOH (62 mg, 0.326 mmol). After 30 minutes  $\text{H}_2\text{O}$  (20

mL) was added to terminate the reaction and to cleave the mixed acetal formed as byproduct. Finally  $\text{K}_2\text{CO}_3$  was added and the layers were separated. The aqueous phase was extracted with MTBE (5 x 25 mL), and the combined organic solutions were dried over  $\text{MgSO}_4$  and concentrated under reduced pressure. The residue was purified by flash column chromatography (hexanes/EtOAc, 3:1) to afford the title compound, 7.46 g (30.8 mmol, 95%), as an oil.

Data are: tlc  $R_f$  = 0.41 (hexanes/EtOAc, 2:1);  $[\alpha]_D^{20}$  = +25.1° (c 1,  $\text{CHCl}_3$ );  $^1\text{H}$  NMR (400 MHz,  $\text{CD}_3\text{OD}$ )  $\delta$  5.36 (app dt,  $J$  = 6.8, 1.3 Hz, 1 H), 4.08 (app d,  $J$  = 6.8, 2 H), 3.64 (d,  $J$  = 11.4 Hz, 1 H), 3.54 (dd,  $J$  = 10.3, 1.7 Hz, 1 H), 3.23 (d,  $J$  = 11.4 Hz, 1 H), 2.19-2.15 (m, 1 H), 2.01-1.97 (m, 1 H), 1.65 (s, 3 H), 1.58 (dddd,  $J$  = 13.7, 9.1, 7.5, 1.7 Hz, 1 H), 1.40 (s, 3 H), 1.38-1.34 (m, 1 H), 1.34 (s, 3 H), 0.98 (s, 3 H), 0.73 (s, 3 H);  $^{13}\text{C}$  NMR (100 MHz,  $\text{CD}_3\text{OD}$ )  $\delta$  139.2, 125.4, 100.0, 77.5, 73.0, 59.4, 36.9, 33.7, 30.0, 28.2, 21.9, 19.4, 18.5, 16.1; IR (neat)  $\nu$  3420, 2990, 2951, 2856, 1463, 1391, 1378, 1360, 1263, 1228, 1198, 1171, 1157, 1102, 1072, 1050, 1004, 937, 921, 904, 848.

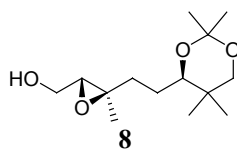

**Epoxide 8.** A flame-dried 3-neck 250 mL round bottom flask equipped with a pressure equalized dropping funnel was charged with powdered 4Å molecular sieves (816 mg) and 40 mL of dry  $\text{CH}_2\text{Cl}_2$ . The solution was cooled to -15 to -20°C, and then  $\text{Ti}(\text{iPrO})_4$  (296  $\mu\text{L}$ , 1 mmol) was added, followed by (-)-diethyl-D-tartrate (205  $\mu\text{L}$ , 1.2 mmol) in 7 mL of dry  $\text{CH}_2\text{Cl}_2$  and *t*butyl hydroperoxide (3.64 mL, 5.5 M in  $\text{CH}_2\text{Cl}_2$ ). After 30 minutes the suspension was cooled to -25°C before the above synthesized allylic alcohol (2.42 g, 10 mmol) dissolved in 50 mL of dry  $\text{CH}_2\text{Cl}_2$  was introduced dropwise via a dropping funnel. The reaction was allowed to stir for 16 h at -25°C and then filtered through a plug of celite. The filtrate was mixed with 20 mL of  $\text{H}_2\text{O}$  and warmed to room temperature, then 30 mL of brine-saturated aqueous NaOH (30%) was added and the mixture was vigorously stirred for 1 h. The aqueous layer was separated and extracted with  $\text{CH}_2\text{Cl}_2$  (5 x 20 mL). The combined organic layers were dried over anhydrous  $\text{MgSO}_4$  and concentrated under reduced pressure. Flash chromatography (hexanes/EtOAc, 3:1) afforded the title compound as an oil along with a small amount of recovered starting material. The procedure was repeated twice with allylic alcohol (2.42 g, 2.2 g,  $\Sigma$  = 7.04 g, 29 mmol) as described above. A final epoxidation was carried out with the combined recovered starting materials (1.22 g) to deliver an overall yield of 5.97 g (23.1 mmol, 80%).

Data are: tlc  $R_f$  = 0.27 (hexanes/EtOAc, 2/1);  $[\alpha]_D^{20}$  = +22.9° (c 1,  $\text{CHCl}_3$ );  $^1\text{H}$  NMR (400 MHz,  $\text{CD}_3\text{OD}$ )  $\delta$  3.70 (dd,  $J$  = 12.2, 5.0 Hz, 1 H), 3.65 (d,  $J$  = 11.4 Hz, 1 H), 3.61 (dd,  $J$  = 12.2, 6.3 Hz, 1 H), 3.56 (dd,  $J$  = 9.9, 1.8 Hz, 1 H), 3.23 (d,  $J$  = 11.4 Hz, 1 H), 2.91 (dd,  $J$  = 6.3, 5.0 Hz, 1 H), 1.89-1.80 (m, 1 H), 1.59-1.50 (m, 1 H), 1.42 (bs, 3 H), 1.41-1.35 (m, 2 H), 1.33 (bs, 3 H), 1.26 (s, 3 H), 0.99 (s, 3 H), 0.75 (s, 3 H);  $^{13}\text{C}$  NMR (100 MHz,  $\text{CD}_3\text{OD}$ )  $\delta$  100.0,

78.0, 72.9, 64.2, 61.8, 61.7, 35.9, 33.8, 30.0, 25.7, 21.9, 19.4, 18.4, 17.0; IR (neat)  $\nu$  3427, 2990, 2958, 2862, 1462, 1392, 1378, 1360, 1262, 1198, 1157, 1105, 1078, 1041, 1009, 920, 899, 855.

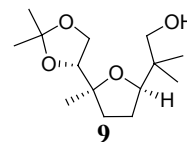

**South fragment 9.** A 250 mL round bottom flask was charged with epoxide **8** (2.72 g, 10.5 mmol) and 100 mL of dry  $\text{CH}_2\text{Cl}_2$ . A solution of ethylene glycol (704  $\mu\text{L}$ , 12.6 mmol) in 55 mL of dry  $\text{CH}_2\text{Cl}_2$ /THF (10:1) was added, followed by dry *p*TsOH (181 mg, 1.05 mmol). After 30 minutes, complete conversion of the starting material was observed before 2,2-dimethoxy propane (17 mL) was introduced. The solution was allowed to stir for 16 h and then terminated by addition of saturated  $\text{NaHCO}_3$  solution (30 mL). The aqueous layer was separated and extracted with MTBE (5 x 20 mL). The combined organic layers were dried over anhydrous  $\text{MgSO}_4$  and concentrated under reduced pressure. Flash chromatography (hexanes/EtOAc, 2:1) afforded the title compound, 2.19 g (8.48 mmol, 81%), as an oil.

Data are: tlc  $R_f$  = 0.34 (hexanes/EtOAc, 2/1);  $[\alpha]_D^{20}$  = -4.5° (c 1,  $\text{CHCl}_3$ );  $^1\text{H}$  NMR (400 MHz,  $\text{CDCl}_3$ )  $\delta$  4.02-3.98 (m, 2 H), 3.83 (dd,  $J$  = 9.4, 6.1 Hz, 1 H), 3.76 (dd,  $J$  = 6.8, 4.6 Hz, 1 H), 3.47 (dd,  $J$  = 11.3, 6.9 Hz, 1 H), 3.40 (dd,  $J$  = 11.3, 5.1 Hz, 1 H), 3.16 (dd,  $J$  = 6.8, 5.3 Hz, 1 H), 2.00 (ddd,  $J$  = 12.3, 8.5, 3.7 Hz, 1 H), 1.84-1.76 (m, 2 H), 1.63 (dt,  $J$  = 12.3, 8.7 Hz, 1 H), 1.43 (bs, 3 H), 1.33 (bs, 3 H), 1.17 (s, 3 H), 0.90 (s, 3 H), 0.86 (s, 3 H);  $^{13}\text{C}$  NMR (100 MHz,  $\text{CDCl}_3$ )  $\delta$  109.4, 86.5, 83.3, 80.1, 71.7, 65.7, 37.3, 33.8, 27.1, 26.2, 24.8, 22.9, 22.1; IR (neat)  $\nu$  3458, 2965, 2873, 1457, 1370, 1261, 1211, 1156, 1058, 900, 854; HRMS (ESI) found 281.1738  $[\text{M} + \text{Na}]^+$ , calcd 281.1729 for  $\text{C}_{19}\text{H}_{32}\text{O}_3\text{Na}^+$ .

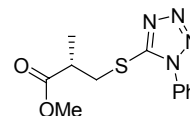

(no compound number was assigned in the manuscript)

**(2S)-Methyl-3-(1-phenyl-1H-tetrazol-5-ylsulfanyl)propionic acid methyl ester.** A flame-dried 100 mL round bottom flask equipped with a pressure equalized dropping funnel was charged with (-)-methyl D- $\beta$ -hydroxyisobutyrate **10** (1 g, 8.47 mmol), triphenylphosphine (3.33 g, 12.7 mmol) and 20 mL of anhydrous THF. The solution was cooled to 0°C and a solution of DIAD (2.57 g, 12.7 mmol) and 1-phenyl-1H-tetrazole-5-thiol (2.26 g, 12.7 mmol) in 20 mL of anhydrous THF was added dropwise via the dropping funnel. After warming to room temperature within 2 h the solution was stirred for additional 3 h. Then 40 mL  $\text{H}_2\text{O}$  and 100 mL MTBE were added. The aqueous layer was separated and extracted with MTBE (2 x 50 mL). The combined organic layers were dried over anhydrous  $\text{Na}_2\text{SO}_4$  and concentrated under reduced pressure. Flash chromatography (hexanes/EtOAc,

2.5:1) afforded the title compound, 2.31 g (8.29 mmol, 98%), as an oil.

Data are: tlc  $R_f$  = 0.33 (hexanes/EtOAc, 2.5:1);  $[\alpha]_D^{20}$  = -89.5° (*c* 1, CHCl<sub>3</sub>); <sup>1</sup>H NMR (400 MHz, CDCl<sub>3</sub>) δ 7.59-7.53 (m, 5 H), 3.70 (s, 3 H), 3.58 (dm, *J* = 6.9 Hz, 2 H), 3.16-3.06 (m, 1 H), 1.35 (d, *J* = 7.2 Hz, 3 H); <sup>13</sup>C NMR (100 MHz, CDCl<sub>3</sub>) δ 174.7, 154.0, 133.4, 130.0, 129.7, 123.6, 51.9, 39.4, 35.5, 16.8; IR (neat) ν 3068, 2979, 2953, 2879, 2854, 1732, 1597, 1500, 1460, 1434, 1411, 1387, 1357, 1302, 1279, 1239, 1220, 1171, 1114, 1090, 1075, 1042, 1015, 981, 916, 860, 825, 762, 694; MS (EI) *m/z* (%) 278 (M<sup>+</sup>, 14), 204 (29), 162 (39), 145 (50), 133 (39), 120 (32), 118 (71), 101 (17), 85 (14), 77 (20), 76 (100), 73 (19). HRMS (EI) found 278.0836 M<sup>+</sup>, calcd 278.0838 for C<sub>12</sub>H<sub>14</sub>N<sub>4</sub>SO<sub>2</sub>.

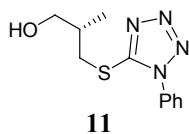

11

**(2S)-Methyl-3-(1-phenyl-1H-tetrazol-5-ylsulfanyl)propan-1-ol 11.** A 500 mL round bottom flask equipped with a pressure equalized dropping funnel was charged with the thioether (11.8 g, 42.4 mmol) described above and 150 mL of anhydrous THF. The solution was then cooled to 0°C and LiEt<sub>3</sub>BH (93 mL, 1.0 M THF) was cautiously added during 1 h via dropping funnel. After an additional hour 70 mL of saturated NH<sub>4</sub>Cl solution was added. THF was distilled off under reduced pressure and the resulting mixture was extracted with CH<sub>2</sub>Cl<sub>2</sub> (3 x 50 mL). The organic layer was dried over anhydrous Na<sub>2</sub>SO<sub>4</sub> and concentrated. Flash chromatography (hexanes/EtOAc, 2.5:1) afforded the title compound, 9.91 g (39.6 mmol, 93%), as an oil.

Data are: tlc  $R_f$  = 0.09 (hexanes/EtOAc, 2.5:1);  $[\alpha]_D^{20}$  = -10.4° (*c* 1, CHCl<sub>3</sub>); <sup>1</sup>H NMR (400 MHz, CDCl<sub>3</sub>) δ 7.62-7.52 (m, 5 H), 3.67 (dd, *J* = 11.5, 4.3 Hz, 2 H), 3.55-3.44 (m, 3 H), 2.27-2.15 (m, 1 H), 1.06 (d, *J* = 6.9 Hz, 3 H); <sup>13</sup>C NMR (100 MHz, CDCl<sub>3</sub>) δ 155.4, 133.5, 130.2, 129.8, 123.9, 64.6, 36.8, 36.3, 15.9; IR (neat) ν 3391, 3066, 2960, 2930, 2874, 2337, 1596, 1498, 1460, 1409, 1385, 1317, 1278, 1240, 1176, 1089, 1073, 1038, 1014, 984, 941, 915, 841, 814, 759, 713, 685, 552, 516; MS (EI) *m/z* (%) 250 (M<sup>+</sup>, 6), 220 (66), 208 (22), 203 (17), 179 (42), 178 (91), 163 (27), 150 (36), 135 (45), 119 (47), 118 (100), 117 (68), 104 (83), 91 (54), 77 (75), 65 (30); HRMS (EI) found 250.0894 M<sup>+</sup>, calcd 250.0888 for C<sub>11</sub>H<sub>14</sub>N<sub>4</sub>SO<sub>2</sub>.

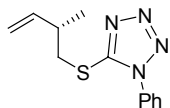

(no compound number was assigned in the manuscript)

**5-[(2S)-Methyl-but-3-enylsulfanyl]-1-phenyl-1H-tetrazole.** A 250 mL round bottom flask was charged with alcohol **11** (2.28 g, 9.1 mmol) and 80 mL of anhydrous CH<sub>2</sub>Cl<sub>2</sub>. The solution was then cooled to 0°C and NaHCO<sub>3</sub> (2.28 g, 27.3 mmol) was added, followed by Dess-Martin periodinane (4.96 g, 11.7 mmol) in portions. After 30

minutes the mixture is poured in 100 mL of saturated NaHCO<sub>3</sub> solution and diluted with 200 mL hexanes. The organic layer was washed twice with NaHCO<sub>3</sub> solution (100 mL), and the combined aqueous layers were reextracted once with hexanes (100 mL). The combined hexane solutions were dried over Na<sub>2</sub>SO<sub>4</sub>, filtered, and concentrated to furnish the crude aldehyde. A flame-dried 3-neck 250 mL round bottom flask equipped with a pressure equalized dropping funnel was charged with methyl triphenylphosphonium bromide (6.5 g, 18.2 mmol) and 100 mL of anhydrous THF. This mixture was cooled to 0°C and LDA (9 mL, 2 M THF/heptane) was introduced via syringe in portions. After 30 minutes the crude aldehyde, dissolved in 25 mL of anhydrous THF, was added slowly via dropping funnel. After 30 minutes the reaction was terminated with 50 mL of saturated NH<sub>4</sub>Cl solution. THF was distilled off in vacuum and the resulting mixture was extracted with CH<sub>2</sub>Cl<sub>2</sub> (3 x 50 mL). The organic layer was dried over anhydrous Na<sub>2</sub>SO<sub>4</sub> and concentrated. Flash chromatography (hexanes/EtOAc, 10:1) delivers the desired olefin, 1.70 g (6.9 mmol, 76%), as an oil.

Data are: tlc  $R_f$  = 0.50 (hexanes/EtOAc, 2.5:1);  $[\alpha]_D^{20}$  = -15.9° (*c* 1, CHCl<sub>3</sub>); <sup>1</sup>H NMR (400 MHz, CDCl<sub>3</sub>) δ 7.63-7.49 (m, 5 H), 5.75 (ddd, *J* = 17.3, 10.2, 7.2 Hz, 1 H), 5.12-5.02 (m, 2 H), 3.42 (d, *J* = 2.5 Hz, 1 H), 3.41 (d, *J* = 3.1 Hz, 1 H), 2.68 (app sept, *J* = 7.0 Hz, 1 H), 1.17 (d, *J* = 6.8 Hz, 3 H); <sup>13</sup>C NMR (100 MHz, CDCl<sub>3</sub>) δ 154.5, 140.9, 133.8, 130.1, 129.8, 123.9, 115.3, 39.5, 37.4, 19.3; IR (neat) ν 3073, 2966, 2930, 2870, 2361, 2338, 1752, 1737, 1641, 1597, 1499, 1459, 1410, 1386, 1332, 1316, 1279, 1238, 1176, 1159, 1088, 1075, 1055, 1041, 1014, 994, 918, 860, 821, 760, 694, 608, 553, 521, 503; MS (EI) *m/z* (%) 246 (M<sup>+</sup>, 74), 231 (20), 203 (27), 199 (95), 185 (19), 178 (34), 176 (53), 171 (18), 163 (73), 150 (30), 145 (60), 135 (74), 117 (100), 104 (29), 101 (74), 91 (74), 85 (32), 77 (86), 69 (28), 67 (74), 65 (74); HRMS (EI) found 246.0934 M<sup>+</sup>, calcd 246.0939 for C<sub>12</sub>H<sub>14</sub>N<sub>4</sub>S.

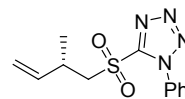

12

**5-[(2S)-methyl-but-3-ene-1-sulfonyl]-1-phenyl-1H-tetrazole 12.** A 250 mL round bottom flask was charged with the olefin from the Wittig reaction (2.81 g, 11.4 mmol) and 75 mL of EtOH. The solution was then cooled to 0°C and (NH<sub>4</sub>)<sub>6</sub>Mo<sub>7</sub>O<sub>24</sub>·4H<sub>2</sub>O (1.41 g, 1.14 mmol) in 35% H<sub>2</sub>O<sub>2</sub> (10 mL, 114 mmol) was added. The reaction was warmed to room temperature and stirred for 24 h. Then 75 mL H<sub>2</sub>O and 150 mL CH<sub>2</sub>Cl<sub>2</sub> were added and the layers were separated. The aqueous layer was extracted with CH<sub>2</sub>Cl<sub>2</sub> (2 x 100 mL), and the combined organic solutions were dried over Na<sub>2</sub>SO<sub>4</sub> and concentrated under reduced pressure. Flash chromatography (hexanes/EtOAc, 2.5:1) furnished the desired sulfon, 2.92 g (10.5 mmol, 92%), as a colourless solid.

Data are: tlc  $R_f$  = 0.49 (hexanes/EtOAc, 2.5:1); mp = 62°C;  $[\alpha]_D^{20}$  = -19.4° (*c* 1, CHCl<sub>3</sub>); <sup>1</sup>H NMR (400 MHz, CDCl<sub>3</sub>) δ 7.68-7.55 (m, 5 H), 5.74 (ddd, *J* = 17.3, 10.3, 7.5 Hz, 1 H),

5.09 (dm,  $J = 17.3$  Hz, 1 H), 5.02 (dm,  $J = 10.3$  Hz, 1 H), 3.90 (dd,  $J = 14.6, 7.1$  Hz, 1 H), 3.68 (dd,  $J = 14.6, 6.4$  Hz, 1 H), 3.02 (app sep,  $J = 7.0$  Hz, 1 H), 1.24 (d,  $J = 6.9$  Hz, 3 H);  $^{13}\text{C}$  NMR (100 MHz,  $\text{CDCl}_3$ )  $\delta$  153.9, 139.5, 133.0, 131.4, 129.6, 125.2, 115.7, 61.3, 32.7, 19.9; IR (neat)  $\nu$  3081, 2971, 2934, 2873, 1643, 1595, 1497, 1460, 1422, 1399, 1347, 1295, 1255, 1205, 1152, 1098, 1075, 1045, 1015, 995, 921, 876, 808, 763, 690, 623, 574, 545, 523; MS (EI)  $m/z$  (%) 278 ( $\text{M}^+$ , 39), 145 (55), 131 (30), 123 (12), 119 (35), 118 (100), 117 (68), 91 (37), 77 (55), 69 (72), 68 (29), 67 (20), 65 (55); HRMS (EI) found 278.0837  $\text{M}^+$ , calcd 278.0838 for  $\text{C}_{12}\text{H}_{14}\text{N}_4\text{SO}_2$ ; Anal. calcd for  $\text{C}_{12}\text{H}_{14}\text{N}_4\text{SO}_2$ : C, 51.78, H 5.07, N 20.13, found: C, 51.47, H 5.10, N 20.09.

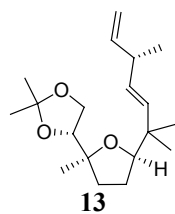

**Julia product 13.** A 100 mL round bottom flask was charged with alcohol **9** (1.64 g, 6.35 mmol) and 40 mL of dry  $\text{CH}_2\text{Cl}_2$ . Subsequently powdered 4Å molecular sieves (1.04 g), NMO (1.11 g, 9.52 mmol) and TPAP (112 mg, 0.318 mmol) were added at room temperature. After 1 h, the reaction mixture was filtered over a plug of silica gel, washed, and the resulting filtrate was concentrated under reduced pressure. The obtained aldehyde (1.37 g, 5.35 mmol, 84%) was directly subjected to the following olefination procedure without further purification. A flame-dried 100 mL round bottom flask was charged with sulfone **12** (1.93 g, 6.95 mmol) and 35 mL of dry THF. The solution was cooled to  $-78^\circ\text{C}$ , then LDA (4 mL, 2 M THF/heptane) was added dropwise via syringe. After 20 minutes, the aldehyde mentioned above (1.37 g, 5.35 mmol) in 5 mL of dry THF was added. The solution was allowed to warm to room temperature and stirred for 16 h, and was then refluxed over 4 h before cooling to room temperature. The reaction mixture was terminated with half-saturated  $\text{NH}_4\text{Cl}$  solution (20 mL), and the aqueous layer was extracted with MTBE (3 x 10 mL). The combined organic layers were dried over anhydrous  $\text{Na}_2\text{SO}_4$  and concentrated under reduced pressure. Flash chromatography (hexanes/EtOAc, 10:1) afforded the title compound, 1.50 g (4.86 mmol, 91%, 76% over 2 steps), as an oil.

Data are: tlc  $R_f = 0.46$  (hexanes/EtOAc 10/1);  $[\alpha]_{\text{D}}^{20} = +25.4^\circ$  ( $c$  1,  $\text{CHCl}_3$ );  $^1\text{H}$  NMR (400 MHz,  $\text{CDCl}_3$ )  $\delta$  5.79 (ddd,  $J = 17.1, 10.4, 6.6$  Hz, 1 H), 5.43 (dd,  $J = 15.9, 0.9$  Hz, 1 H), 5.31 (dd,  $J = 15.9, 6.5$  Hz, 1 H), 4.90-5.02 (m, 2 H), 3.87-4.03 (m, 3 H), 3.65-3.70 (m, 1 H), 2.77-2.87 (m, 1 H), 1.85-1.97 (m, 1 H), 1.72-1.80 (m, 1 H), 1.59-1.69 (m, 2 H), 1.42 (s, 3 H), 1.33 (s, 3 H), 1.16 (s, 3 H), 1.08 (d,  $J = 6.9$  Hz, 3 H), 0.99 (s, 3 H), 0.94 (s, 3 H);  $^{13}\text{C}$  NMR (100 MHz,  $\text{CDCl}_3$ )  $\delta$  143.3, 135.2, 131.6, 112.5, 109.1, 86.3, 82.5, 80.0, 65.6, 40.5, 38.9, 35.9, 26.9, 26.3, 24.9, 24.5, 24.3, 21.1, 20.1; IR (neat)  $\nu$  3081, 2964, 2930, 2872, 1784, 1715, 1635, 1602, 1494, 1454, 1380, 1369, 1262, 1210,

1155, 1069, 1019, 995, 979, 911, 855, 798, 747, 699; HRMS (ESI) found 331.2244  $[\text{M} + \text{Na}]^+$ , calcd 331.2249 for  $\text{C}_{19}\text{H}_{32}\text{O}_3\text{Na}^+$ .

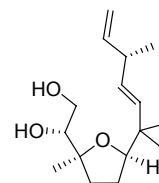

(no compound number was assigned in the manuscript)

**1,2-Diol.** A 100 mL round bottom flask was charged with Julia product **13** (640 mg, 2.07 mmol) and 30 mL of MeOH. After addition of  $p\text{TsOH}$  (79 mg, 0.415 mmol) the solution was warmed to  $50^\circ\text{C}$  for 18 h and then cooled to room temperature. The reaction was stopped by addition of saturated  $\text{NaHCO}_3$  solution (20 mL), and the mixture was extracted with  $\text{CH}_2\text{Cl}_2$  (3 x 30 mL). The combined organic phases were dried over  $\text{Na}_2\text{SO}_4$  and the crude product was purified over a short column (hexanes/EtOAc, 10:1  $\rightarrow$  EtOAc) to provide the desired diol, 405 mg (1.51 mmol, 73%), as an oil, along with recovered starting material, 168 mg (545  $\mu\text{mol}$ , >26%).

Data are: tlc  $R_f = 0.04$  (hexanes/ EtOAc, 10:1);  $[\alpha]_{\text{D}}^{20} = +9.9^\circ$  ( $c$  1,  $\text{CHCl}_3$ );  $^1\text{H}$  NMR (400 MHz,  $\text{CDCl}_3$ )  $\delta$  5.78 (ddd,  $J = 17.1, 10.4, 6.6$  Hz, 1 H), 5.44 (d,  $J = 15.9$  Hz, 1 H), 5.38 (dd,  $J = 15.9, 5.8$  Hz, 1 H), 5.03-4.91 (m 2 H), 3.74-3.63 (m, 3 H), 3.56 (dd,  $J = 10.8, 7.0$  Hz, 1 H), 2.89-2.79 (m, 1 H), 2.75 (br s, 2 H), 1.97-1.78 (m, 2 H), 1.70-1.59 (m, 1 H), 1.55-1.46 (m, 1 H), 1.15 (s, 3 H), 1.09 (d,  $J = 6.9$  Hz, 3 H), 1.04 (s, 3 H), 0.96 (s, 3 H);  $^{13}\text{C}$  NMR (100 MHz,  $\text{CDCl}_3$ )  $\delta$  143.1, 134.4, 132.7, 112.7, 84.9, 84.1, 76.6, 63.2, 40.4, 38.9, 32.5, 26.9, 24.6, 24.5, 22.1, 20.0; HRMS (ESI) found 291.1949  $[\text{M} + \text{Na}]^+$ , calcd 291.1936 for  $\text{C}_{16}\text{H}_{28}\text{O}_3\text{Na}^+$ .

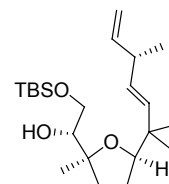

(no compound number was assigned in the manuscript)

**TBS-alcohol.** A 100 mL round bottom flask was charged with the deprotected 1,2-diol (660 mg, 2.46 mmol) and 30 mL of dry  $\text{CH}_2\text{Cl}_2$ . Then imidazole (330 mg, 4.85 mmol) was added, followed by TBS-Cl (580 mg, 3.85 mmol) and DMAP (15 mg, 0.123 mmol). After 30 minutes the reaction was terminated by addition of saturated  $\text{NH}_4\text{Cl}$  solution (10 mL). The aqueous layer was extracted once with  $\text{CH}_2\text{Cl}_2$  (10 mL), and the combined organic solutions were dried over  $\text{Na}_2\text{SO}_4$  and concentrated under reduced pressure. Filtration over silica gel (hexanes/EtOAc, 10:1) afforded the TBS-protected alcohol, 929 mg (2.43 mmol, 99%), as an oil.

Data are: tlc  $R_f = 0.49$  (hexanes/EtOAc, 10:1);  $[\alpha]_{\text{D}}^{20} = +21.0^\circ$  ( $c$  1,  $\text{CHCl}_3$ );  $^1\text{H}$  NMR (400 MHz,  $\text{CDCl}_3$ )  $\delta$  5.78 (ddd,  $J = 17.1, 10.4, 6.5$  Hz, 1 H), 5.43 (dd,  $J = 15.9, 0.6$  Hz, 1 H), 5.33 (dd,  $J = 15.9, 6.5$  Hz, 1 H), 5.00-4.90 (m 2

H), 3.76 (dd,  $J = 10.3$  Hz, 3.9 Hz, 1 H), 3.69 (dd,  $J = 8.0$ , 6.7 Hz, 1 H), 3.62 (dd,  $J = 10.3$ , 7.0 Hz, 1 H), 3.51 (ddd,  $J = 7.0$ , 3.9, 2.5 Hz, 1 H), 2.82 (app sex,  $J = 6.5$  Hz, 1 H), 2.64 (d,  $J = 2.5$  Hz, 1 H), 2.02-1.94 (m, 1 H), 1.84-1.75 (m, 1 H), 1.67-1.50 (m, 2 H), 1.14 (s, 3 H), 1.07 (d,  $J = 6.9$  Hz, 3 H), 1.01 (s, 3 H), 0.95 (s, 3 H), 0.90 (s, 9 H), 0.08 (s, 6 H);  $^{13}\text{C}$  NMR (100 MHz,  $\text{CDCl}_3$ )  $\delta$  143.2, 135.0, 132.1, 112.6, 85.5, 83.7, 76.6, 63.7, 40.4, 39.0, 34.2, 26.9, 25.9, 24.5, 24.3, 21.7, 20.1, 18.3, -5.36, -5.37; IR (neat)  $\nu$  3575, 3080, 2958, 2930, 2858, 2711, 1636, 1463, 1408, 1385, 1362, 1327, 1253, 1096, 1061, 1024, 994, 938, 910, 834, 776, 741, 677; HRMS (ESI) found 405.2817  $[\text{M} + \text{Na}]^+$ , calcd 408.2801 for  $\text{C}_{22}\text{H}_{42}\text{O}_3\text{SiNa}^+$ .

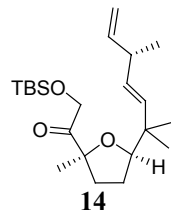

**TBS-ketone 14.** A 100 mL round bottom flask was charged with the TBS protected alcohol (875 mg, 2.29 mmol) and 20 mL of dry  $\text{CH}_2\text{Cl}_2$ . The solution was cooled to  $0^\circ\text{C}$ , then Dess-Martin periodinane (1.5 g, 3.54 mmol) was added. After addition the reaction mixture was warmed to room temperature and stirred for 2 h, before saturated  $\text{NaHCO}_3$  solution (20 mL) and  $\text{Na}_2\text{S}_2\text{O}_3$  solution (10 mL) were added. The aqueous layer was separated and extracted once with  $\text{CH}_2\text{Cl}_2$  (10 mL). The combined organic solutions were dried over  $\text{Na}_2\text{SO}_4$  and concentrated under reduced pressure. Flash chromatography (hexanes/EtOAc, 40:1) afforded the desired ketone, 828 mg (2.17 mmol, 95%), as an oil.

Data are: tlc  $R_f = 0.53$  (hexanes/EtOAc, 10:1);  $[\alpha]_D^{20} = -12.3^\circ$  (c 1,  $\text{CHCl}_3$ );  $^1\text{H}$  NMR (400 MHz,  $\text{CDCl}_3$ )  $\delta$  5.77 (ddd,  $J = 17.1$ , 10.4, 6.6 Hz, 1 H), 5.42 (d,  $J = 16.0$  Hz, 1 H), 5.34 (dd,  $J = 16.0$ ,  $J = 6.6$  Hz, 1 H), 5.01-4.90 (m 2 H), 4.69 (br s, 2 H), 3.75 (dd,  $J = 8.2$ , 6.1 Hz, 1 H), 2.82 (ps sex,  $J = 6.6$  Hz, 1 H), 2.03-1.98 (m, 1 H), 1.85-1.72 (m, 2 H), 1.58-1.49 (m, 1 H), 1.29 (s, 3 H), 1.07 (d,  $J = 6.9$  Hz, 3 H), 1.03 (s, 3 H), 0.99 (s, 3 H), 0.92 (s, 9 H), 0.09 (s, 3 H), 0.08 (s, 3 H);  $^{13}\text{C}$  NMR (100 MHz,  $\text{CDCl}_3$ )  $\delta$  211.6, 143.1, 134.7, 132.2, 112.7, 87.8, 86.8, 66.5, 40.5, 38.8, 35.8, 26.4, 25.8, 24.3, 24.2, 23.8, 20.1, 18.6, -5.4, -5.5; IR (neat)  $\nu$  3081, 2958, 2929, 2857, 1736, 1636, 1463, 1421, 1387, 1363, 1253, 1160, 1100, 1047, 1002, 938, 912, 835, 777, 735, 681; HRMS (ESI) found 387.2907  $[\text{M} + \text{Li}]^+$ , calcd 387.2902 for  $\text{C}_{22}\text{H}_{40}\text{O}_3\text{SiLi}^+$ .

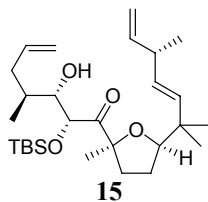

**Aldol product 15.** A 100 mL round bottom flask was charged with the alcohol precursor from aldehyde **B**<sup>6</sup> (700 mg, 7.13 mmol) and 40 mL of dry  $\text{CH}_2\text{Cl}_2$ . The solution

was cooled to  $0^\circ\text{C}$  and Dess-Martin periodinane (3.56 g, 8.39 mmol) was added. After 15 minutes the mixture was warmed to room temperature. After 1 h an additional small amount Dess-Martin periodinane was added, and after 2 h the reaction was terminated by addition of an aqueous 10%  $\text{Na}_2\text{S}_2\text{O}_3$ /saturated  $\text{NaHCO}_3$  solution (50 mL). The organic layer was separated and successively washed with this solution (4 x 50 mL). The combined aqueous phases were then reextracted once with  $\text{CH}_2\text{Cl}_2$  (25 mL), and the combined organic solutions were dried over  $\text{MgSO}_4$  and concentrated cautiously under reduced pressure ( $p = 600$  mbar). The volatile aldehyde obtained was directly subjected to the following aldol procedure. A 100 mL round bottom flask was charged with ketone **14** (650 mg, 1.71 mmol) and 40 mL of dry THF. The solution was cooled to  $-78^\circ\text{C}$ , before KHMDS (3.42 mL, 0.5 M toluene) was introduced dropwise. After 30 minutes the aldehyde **B** in dry THF (5 mL) was added and the solution was stirred for 2 h. The reaction was then terminated by careful addition of MeOH, followed by saturated  $\text{NH}_4\text{Cl}$  solution (10 mL). The flask was warmed to room temperature in the cold bath, then the aqueous layer was separated and extracted with MTBE (3x 10 mL). The combined organic solutions were dried over  $\text{Na}_2\text{SO}_4$  and concentrated under reduced pressure. Flash chromatography (hexanes/EtOAc, 40:1) furnished the desired aldol product, 807 mg (1.69 mmol, 99%), as an oil.

Data are: tlc  $R_f = 0.42$  (hexanes/EtOAc, 10:1);  $[\alpha]_D^{20} = -43.6^\circ$  (c 1,  $\text{CHCl}_3$ );  $^1\text{H}$  NMR (400 MHz,  $\text{CDCl}_3$ )  $\delta$  5.87-5.74 (m, 1 H), 5.76 (ddd,  $J = 17.1$ , 10.4, 6.5 Hz, 1 H), 5.44 (d,  $J = 16.1$  Hz, 1 H), 5.35 (dd,  $J = 16.1$ , 6.7 Hz, 1 H), 5.08 (br s, 1 H), 5.08-4.89 (m, 4 H), 3.88 (t,  $J = 10.6$  Hz, 1 H), 3.79 (dd,  $J = 7.8$ , 6.8 Hz, 1 H), 2.80 (app hex,  $J = 6.7$  Hz, 1 H), 2.61-2.52 (m, 1 H), 2.00-1.69 (m, 6 H), 1.56-1.45 (m, 1 H), 1.34 (s, 3 H), 1.06 (d,  $J = 6.8$  Hz, 3 H), 1.03 (s, 3 H), 1.00 (s, 3 H), 0.96 (d,  $J = 6.8$  Hz, 3 H), 0.92 (s, 9 H), 0.10 (s, 3 H), -0.03 (s, 3 H);  $^{13}\text{C}$  NMR (100 MHz,  $\text{CDCl}_3$ )  $\delta$  212.7, 143.1, 137.2, 134.8, 132.2, 116.1, 112.7, 88.6, 86.3, 76.2, 75.0, 40.5, 38.8, 37.27, 37.26, 36.2, 25.9, 25.6, 24.2, 24.05, 24.03, 20.1, 18.5, 15.9, -4.2, -5.3; IR (neat)  $\nu$  3572, 3077, 2959, 2930, 2858, 1727, 1638, 1462, 1387, 1363, 1253, 1214, 1160, 1100, 1043, 1022, 999, 967, 909, 860, 836, 807, 777, 672; HRMS (ESI) found 479.3577  $[\text{M} + \text{H}]^+$ , calcd 479.3557 for  $\text{C}_{28}\text{H}_{50}\text{O}_4\text{SiH}^+$ .

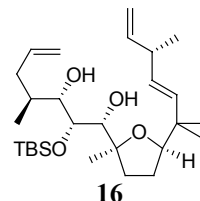

**Syn-diol 16.** A 25 mL round bottom flask was charged with aldol product **15** (200 mg, 418  $\mu\text{mol}$ ) and 10 mL of anhydrous  $\text{CH}_2\text{Cl}_2$  and cooled to  $-78^\circ\text{C}$ , before DIBAL-H (2.1 mL, 1 M hexane) was added. Additional DIBAL-H (0.8 mL) was added after 2.5 h, and a final portion (0.5 mL) 30 minutes thereafter. After 4.5 h the reaction mixture was allowed to warm to  $-30^\circ\text{C}$  and was then terminated with  $\text{H}_2\text{O}$  (340  $\mu\text{L}$ ). 340  $\mu\text{L}$  of a 4 M NaOH solution was

introduced after reaching room temperature, followed by H<sub>2</sub>O (680  $\mu$ L). After 15 minutes Na<sub>2</sub>SO<sub>4</sub> was added and the mixture was filtered. The residue was washed and the combined organic solutions were concentrated under reduced pressure. Flash chromatography delivered the diol, 140 mg (291  $\mu$ mol, 70%), as an oil, along with recovered starting material (56 mg, 117  $\mu$ mol, 28%).

Data are: tlc  $R_f$  = 0.45 (hexanes/EtOAc, 10:1);  $[\alpha]_D^{20}$  = +27.7° (*c* 1, CHCl<sub>3</sub>); <sup>1</sup>H NMR (400 MHz, CDCl<sub>3</sub>)  $\delta$  5.86-5.72 (m, 1 H), 5.77 (ddd, *J* = 17.1, 10.4, 6.7 Hz, 1 H), 5.43 (d, *J* = 15.9, 1 H), 5.37 (dd, *J* = 15.9, 5.9 Hz, 1 H), 5.08-4.89 (m, 4 H), 3.78 (d, *J* = 6.5 Hz, 1 H), 3.71 (dd, *J* = 8.7, 6.2 Hz, 1 H), 3.46 (dd, *J* = 4.5 u. 6.5 Hz, 1 H), 3.17 (t, *J* = 8.6 Hz, 1 H), 2.88 (d, *J* = 8.6 Hz, 1 H), 2.84 (app hex, *J* = 6.3 Hz, 1 H), 2.73 (d, *J* = 4.5 Hz, 1 H), 2.53-2.44 (m, 1 H), 2.14-2.06 (m, 1 H), 1.97 (dt, *J* = 13.7, 8.3 Hz, 1 H), 1.87-1.74 (m, 2 H), 1.72-1.55 (m, 2 H), 1.21 (s, 3 H), 1.08 (d, *J* = 6.9 Hz, 3 H), 1.03 (s, 3 H), 0.95 (s, 3 H), 0.90 (s, 9 H), 0.83 (d, *J* = 6.8 Hz, 3 H), 0.15 (s, 3 H), 0.11 (s, 3 H); <sup>13</sup>C NMR (100 MHz, CDCl<sub>3</sub>)  $\delta$  143.1, 137.2, 134.4, 132.8, 116.1, 112.7, 85.5, 83.9, 77.3, 73.7, 73.6, 40.4, 38.7, 37.1, 35.6, 35.3, 27.3, 26.2, 24.6, 24.5, 21.5, 20.0, 18.6, 15.8, -3.5, -4.76; IR (neat)  $\nu$  3551, 3077, 2959, 2930, 2857, 1639, 1462, 1386, 1362, 1329, 1249, 1215, 1116, 1071, 1037, 994, 959, 937, 910, 892, 858, 834, 802, 776, 681; HRMS (ESI) found 481.3733 [M + H]<sup>+</sup>, calcd 481.3713 for C<sub>28</sub>H<sub>53</sub>O<sub>4</sub>SiH<sup>+</sup>.

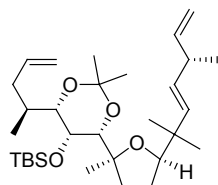

(no compound number was assigned in the manuscript)

**1,3-Acetonide.** A 25 mL round bottom flask was charged with the 1,3-diol **16** (56 mg, 117  $\mu$ mol) and 3 mL of 2,2-dimethoxy propane. *p*TsOH (8.5 mg, 44.7  $\mu$ mol) was added, and after 4 h the reaction was stopped by addition of 3 mL of saturated NaHCO<sub>3</sub> solution. The solution was transferred to a separating funnel and extracted twice with CH<sub>2</sub>Cl<sub>2</sub> (5 mL). The organic phase was dried over Na<sub>2</sub>SO<sub>4</sub> and concentrated under reduced pressure. A short filtration over silica gel (hexanes/EtOAc, 40:1) afforded the desired product, 60 mg (115  $\mu$ mol, 99%), as an oil.

Data are: tlc  $R_f$  = 0.70 (hexanes/EtOAc, 10:1);  $[\alpha]_D^{20}$  = +7.5° (*c* 1, CHCl<sub>3</sub>); <sup>1</sup>H NMR (400 MHz, CDCl<sub>3</sub>)  $\delta$  5.79-5.69 (m, 1 H), 5.78 (ddd, *J* = 17.1, 10.3, 6.5 Hz, 1 H), 5.41 (dd, *J* = 15.9, 0.6 Hz, 1 H), 5.30 (dd, *J* = 15.9, 6.5 Hz, 1 H), 5.05-4.91 (m, 4 H), 3.78 (dd, *J* = 8.3, 4.6 Hz, 1 H), 3.74 (s, 1 H), 3.52 (s, 1 H), 3.18 (d, *J* = 9.7 Hz, 1 H), 2.82 (ps hex, *J* = 6.5 Hz, 1 H), 2.37-2.27 (m, 1 H), 1.98-1.85 (m, 3 H), 1.72-1.61 (m, 1 H), 1.60-1.54 (m, 2 H), 1.46 (s, 3 H), 1.39 (s, 3 H), 1.22 (s, 3 H), 1.07 (d, *J* = 6.9 Hz, 3 H), 0.99 (s, 3 H), 0.94 (s, 3 H), 0.91 (s, 9 H), 0.81 (d, *J* = 6.5 Hz, 3 H), 0.10 (s, 6 H); <sup>13</sup>C NMR (100 MHz, CDCl<sub>3</sub>)  $\delta$  143.3, 136.7, 135.6, 131.5, 116.2, 112.5, 99.1, 85.1, 84.4, 80.7, 78.3, 66.0, 40.5, 39.6, 36.3, 33.8, 31.4, 29.5, 26.4, 26.3, 24.8, 23.8, 21.2, 20.2, 19.1, 18.9, 15.3, -1.6, -2.3; IR (neat)  $\nu$  3077, 2961, 2930, 2892, 2857, 2708, 1826, 1638, 1462,

1414, 1377, 1305, 1252, 1198, 1159, 1101, 1058, 1029, 979, 936, 909, 860, 834, 804, 771, 725, 696, 675; HRMS (ESI) found 521.4025 [M + H]<sup>+</sup>, calcd 521.4026 for C<sub>31</sub>H<sub>56</sub>O<sub>4</sub>SiH<sup>+</sup>.

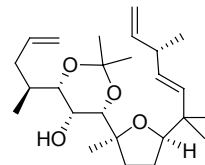

(no compound number was assigned in the manuscript)

**2-deprotected 1,3-Acetonide.** A 25 mL round bottom flask was charged with the TBS-protected acetonide (59 mg, 113  $\mu$ mol) and 1 mL of anhydrous THF. TBAF (158 mg, 501  $\mu$ mol) in 3 mL of anhydrous THF was added, and after 16 h the reaction was stopped by addition of 3 mL of saturated NH<sub>4</sub>Cl solution. The solution was directly filtered through a short column charged with silica gel (hexanes/EtOAc, 40:1) to afford the desired alcohol, 46 mg (113  $\mu$ mol, >99%), as an oil.

Data are: tlc  $R_f$  = 0.48 (hexanes/EtOAc, 10:1);  $[\alpha]_D^{20}$  = +21.7° (*c* 1, CHCl<sub>3</sub>); <sup>1</sup>H NMR (400 MHz, CDCl<sub>3</sub>)  $\delta$  5.84-5.74 (m, 1 H), 5.78 (ddd, *J* = 17.0, 10.5 u. 6.9 Hz, 1 H), 5.49 (dd, *J* = 15.9, 0.6 Hz, 1 H), 5.28 (dd, *J* = 15.9, 6.9 Hz, 1 H), 5.04-4.87 (m, 4 H), 4.09 (d, *J* = 2.6 Hz, 1 H), 3.80-3.76 (m, 1 H), 3.71 (dd, *J* = 8.0 u. 7.1 Hz, 1 H), 3.47 (s, 1 H), 3.24 (d, *J* = 9.5 Hz, 1 H), 2.81 (app hex, *J* = 7.0 Hz, 1 H), 2.42-2.33 (m, 1 H), 2.14-1.90 (m, 3 H), 1.76-1.65 (m, 2 H), 1.57-1.48 (m, 1 H), 1.45 (s, 3 H), 1.36 (s, 3 H), 1.26 (s, 3 H), 1.05 (d, *J* = 6.9 Hz, 3 H), 1.00 (s, 3 H), 0.99 (s, 3 H), 0.91 (d, *J* = 6.8 Hz, 3 H); <sup>13</sup>C NMR (100 MHz, CDCl<sub>3</sub>)  $\delta$  143.5, 136.8, 136.1, 131.2, 116.4, 112.3, 98.8, 86.8, 84.7, 76.5, 75.6, 63.7, 40.5, 39.1, 36.8, 35.2, 32.4, 29.7, 26.9, 24.7, 23.7, 23.2, 20.2, 18.9, 14.3; IR (neat)  $\nu$  3478, 3076, 2968, 2934, 2872, 1729, 1638, 1462, 1377, 1262, 1202, 1175, 1156, 1120, 1086, 1062, 1025, 993, 982, 910, 863, 814; HRMS (ESI) found 429.2985 [M + Na]<sup>+</sup>, calcd 429.2981 for C<sub>25</sub>H<sub>42</sub>O<sub>4</sub>Na<sup>+</sup>.

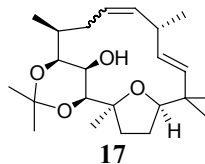

**Metathesis product 17.** A 50 mL round bottom flask with a reflux condenser was charged with the deprotected alcohol (22 mg, 54.1  $\mu$ mol) and 27 mL of anhydrous CH<sub>2</sub>Cl<sub>2</sub>. Then Grubbs II catalyst (4.6 mg, 5.42  $\mu$ mol) was added and the reaction was refluxed over 2h before cooling to room temperature. The solution was saturated with air and silica gel (100 mg) was added. After concentration the resulting solid was purified by flash column chromatography (hexanes/EtOAc, 10:1) to afford the macrocycle **17**, 14.5 mg (38.3  $\mu$ mol, 71%), as a colourless solid (*Z:E*  $\approx$  6:1).

Data are: tlc  $R_f$  = 0.43 (hexanes/EtOAc, 10:1); mp = 138°C;  $[\alpha]_D^{20}$  = +37.2° (*c* 1, CHCl<sub>3</sub>); <sup>1</sup>H NMR (500 MHz, CDCl<sub>3</sub>)  $\delta$  (Z-isomer) 5.60 (d, *J* = 15.6 Hz, 1 H), 5.28-5.17 (m, 3 H),

3.92 (d,  $J = 11.3$  Hz, 1 H), 3.69 (d,  $J = 6.1$  Hz, 1 H), 3.54 (dd,  $J = 11.8, 4.4$  Hz, 1 H), 3.28 (br s, 1 H), 3.34-3.23 (m, 1 H), 2.55-2.42 (m, 2 H), 2.12-2.06 (m, 1 H), 2.06-1.91 (m, 2 H), 1.86-1.77 (m, 1 H), 1.70-1.62 (m, 1 H), 1.44 (s, 3 H), 1.39 (s, 3 H), 1.35-1.27 (m, 1 H), 1.15 (s, 3 H), 1.11 (s, 3 H), 1.09 (d,  $J = 7.0$  Hz, 3 H), 1.01 (d,  $J = 6.6$  Hz, 3 H), 0.90 (s, 3 H);  $\delta$  (*E*-isomer) 5.72 (ddd,  $J = 15.1, 11.0, 3.2$  Hz, 1 H), 5.59 (d,  $J = 15.9$  Hz, 1 H), 5.38 (ddd,  $J = 15.1, 9.6, 2.2$  Hz, 1 H), 5.36 (dd,  $J = 15.9, 6.7$  Hz, 1 H), 4.17 (d,  $J = 10.4$  Hz, 1 H), 3.65 (d,  $J = 9.9$  Hz, 1 H), 3.50 (dd,  $J = 11.2, 5.0$  Hz, 1 H), 3.44 (br s, 1 H), 2.92-2.83 (m, 1 H), 2.55-2.42 (m, 2 H), 2.12-2.06 (m, 1 H), 2.06-1.91 (m, 2 H), 1.86-1.77 (m, 1 H), 1.70-1.62 (m, 1 H), 1.41 (s, 3 H), 1.39 (s, 3 H), 1.35-1.27 (m, 1 H), 1.20 (d,  $J = 7.4$  Hz, 3 H), 1.15 (s, 3 H), 1.11 (s, 3 H), 1.04 (d,  $J = 7.3$  Hz, 3 H), 0.91 (s, 3 H);  $^{13}\text{C}$  NMR (125 MHz,  $\text{CDCl}_3$ )  $\delta$  (*Z*-isomer) 134.7, 132.8, 132.3, 125.7, 99.5, 86.4, 82.3, 77.7, 74.3, 63.6, 38.2, 36.7, 35.9, 33.1, 31.7, 29.9, 28.1, 28.0, 26.2, 25.9, 21.3, 19.1, 16.2;  $\delta$  (*E*-isomer) 135.5, 133.3, 132.8, 125.1, 99.4, 86.3, 82.0, 77.8, 77.4, 65.6, 41.4, 38.1, 36.4, 36.0, 32.7, 29.9, 28.2, 28.0, 27.0, 25.2, 21.4, 19.1, 13.4; IR (neat)  $\nu$  3582, 2962, 2936, 2871, 2840, 1728, 1679, 1602, 1578, 1510, 1453, 1397, 1381, 1360, 1304, 1258, 1201, 1170, 1101, 1086, 1071, 1056, 1035, 1000, 985, 907, 865, 835, 810, 732, 703; HRMS (ESI) found 379.2841  $[\text{M} + \text{H}]^+$ , calcd 379.2848 for  $\text{C}_{23}\text{H}_{39}\text{O}_4^+$ .

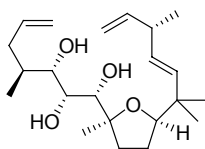

(no compound number was assigned in the manuscript)

**Triol.** A 25 mL round bottom flask was charged with the TBS-protected diol **16** (141 mg, 293  $\mu\text{mol}$ ) and 5 mL of anhydrous THF. TBAF (215 mg, 682  $\mu\text{mol}$ ) was added, and after 4 h the reaction was directly filtered through a short column with silica gel (hexanes/EtOAc, 10:1) to afford the desired triol, 104 mg (284  $\mu\text{mol}$ , 97%), as an oil. Data are: tlc  $R_f = 0.08$  (hexanes/EtOAc, 10:1);  $[\alpha]_{\text{D}}^{20} = +14.4^\circ$  (c 1,  $\text{CHCl}_3$ );  $^1\text{H}$  NMR (400 MHz,  $\text{CDCl}_3$ )  $\delta$  5.87-5.73 (m, 2 H), 5.45 (d,  $J = 15.9$  Hz, 1 H), 5.38 (dd,  $J = 15.9, 6.1$  Hz, 1 H), 5.08-4.90 (m, 4 H), 3.98 (br s, 1 H), 3.74 (dd,  $J = 8.9, 6.5$  Hz, 1 H), 3.68-3.64 (m, 1 H), 3.48-3.39 (m, 2 H), 3.15-3.04 (m, 2 H), 2.83 (app hex,  $J = 6.5$  Hz, 1 H), 2.42-2.34 (m, 1 H), 2.18 (ddd,  $J = 12.1, 9.4, 4.7$  Hz, 1 H), 2.03-1.94 (m, 1 H), 1.89-1.76 (m, 2 H), 1.76-1.66 (m, 1 H), 1.64-1.54 (m, 1 H), 1.23 (s, 3 H), 1.08 (d,  $J = 6.9$  Hz, 3 H), 1.03 (s, 3 H), 0.96 (s, 3 H), 0.95 (d,  $J = 6.8$  Hz, 3 H);  $^{13}\text{C}$  NMR (100 MHz,  $\text{CDCl}_3$ )  $\delta$  143.1, 137.8, 134.4, 132.8, 116.0, 112.8, 86.7, 86.1, 77.8, 76.8, 69.2, 40.5, 38.8, 36.3, 35.4, 34.9, 27.0, 24.6, 24.4, 23.6, 20.0, 16.1; IR (neat)  $\nu$  3457, 3076, 2962, 2929, 2871, 1727, 1638, 1458, 1384, 1272, 1073, 1054, 1024, 993, 911, 849, 792, 743, 670; HRMS (ESI) found 389.2667  $[\text{M} + \text{Na}]^+$ , calcd 389.2668 for  $\text{C}_{22}\text{H}_{38}\text{O}_4\text{Na}^+$ .

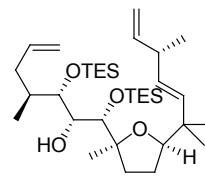

(no compound number was assigned in the manuscript)

**Bis-TES protected alcohol.** A 25 mL round bottom flask was charged with the deprotected triol (84 mg, 229  $\mu\text{mol}$ ) and 12 mL of anhydrous DMF. Then imidazole (95 mg, 1.40 mmol) was added, followed by TES-Cl (120  $\mu\text{L}$ , 108 mg, 715  $\mu\text{mol}$ ). After 20 h the mixture was warmed to  $30^\circ\text{C}$  and a second portion TES-Cl (80  $\mu\text{L}$ , 72 mg, 477  $\mu\text{mol}$ ) was introduced. The reaction was terminated after 6 h at  $30^\circ\text{C}$  by addition of saturated  $\text{NH}_4\text{Cl}$  solution (10 mL) and hexanes (20 mL). Then, the aqueous layer was separated and extracted with hexanes (3 x 20 mL). The combined organic solutions were dried over  $\text{Na}_2\text{SO}_4$  and concentrated under reduced pressure. Flash chromatography (hexanes/EtOAc, 40:1) furnished the desired alcohol, 132 mg (222  $\mu\text{mol}$ , 97%), as an oil.

Data are: tlc  $R_f = 0.29$  (hexanes/EtOAc, 40:1);  $[\alpha]_{\text{D}}^{20} = +9.3^\circ$  (c 1,  $\text{CHCl}_3$ );  $^1\text{H}$  NMR (400 MHz,  $\text{CDCl}_3$ )  $\delta$  5.83-5.69 (m, 2 H), 5.46 (dd,  $J = 15.9, 1.1$  Hz, 1 H), 5.33 (dd,  $J = 15.9, 6.5$  Hz), 5.03-4.89 (m, 4 H), 3.75 (dd,  $J = 8.7, 5.8$  Hz, 1 H), 3.65 (br s, 1 H), 3.46 (dd,  $J = 8.8, 1.8$  Hz, 1 H), 3.39 (t,  $J = 8.8$  Hz, 1 H), 2.80 (app hex,  $J = 6.7$  Hz, 1 H), 2.63 (d,  $J = 8.8$  Hz, 1 H), 2.19-2.10 (m, 1 H), 1.97-1.81 (m, 2 H), 1.71-1.56 (m, 3 H), 1.32 (q,  $J = 10.4$  Hz, 1 H), 1.17 (s, 3 H), 1.07 (d,  $J = 6.9$  Hz, 3 H), 1.01-0.93 (m, 27 H), 0.69-0.59 (m, 12 H);  $^{13}\text{C}$  NMR (100 MHz,  $\text{CDCl}_3$ )  $\delta$  143.4, 138.0, 135.4, 131.6, 115.5, 112.5, 86.1, 84.6, 79.1, 77.2, 72.8, 40.4, 39.3, 34.86, 34.85, 34.3, 26.0, 24.2, 24.1, 20.0, 18.4, 18.0, 7.1, 7.0; IR (neat)  $\nu$  3508, 3077, 2956, 2911, 2875, 1731, 1639, 1459, 1414, 1378, 1269, 1238, 1139, 1114, 1093, 1066, 1006, 976, 911, 846, 811, 741, 673; HRMS (ESI) found 617.4381  $[\text{M} + \text{Na}]^+$ , calcd 617.4397 for  $\text{C}_{34}\text{H}_{66}\text{Si}_2\text{O}_4\text{Na}^+$ .

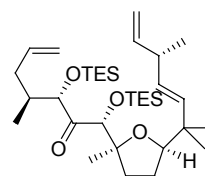

(no compound number was assigned in the manuscript)

**TES ketone.** A 50 mL round bottom flask was charged with the TES alcohol (115 mg, 193  $\mu\text{mol}$ ) and 15 mL of dry  $\text{CH}_2\text{Cl}_2$ . The solution was then charged with Dess-Martin periodinane (342 mg, 806  $\mu\text{mol}$ ) and stirred for 1.5 h. The reaction mixture was terminated by addition of saturated  $\text{NaHCO}_3$  solution (3 mL) and saturated  $\text{Na}_2\text{S}_2\text{O}_3$  solution (3 mL) and vigorously stirred for 30 minutes. The aqueous layer was separated and extracted once with  $\text{CH}_2\text{Cl}_2$  (5 mL). The organic solutions were dried over  $\text{Na}_2\text{SO}_4$  and concentrated under reduced pressure. Flash chromatography (hexanes/EtOAc, 40:1) afforded the desired ketone, 106 mg (179  $\mu\text{mol}$ , 93%), as an oil.

Data are: tlc  $R_f = 0.39$  (hexanes/EtOAc, 40:1), 0.74 (hexanes/EtOAc, 10:1);  $[\alpha]_{\text{D}}^{20} = +40.1^\circ$  (c 1,  $\text{CHCl}_3$ );  $^1\text{H}$  NMR (400 MHz,  $\text{CDCl}_3$ )  $\delta$  5.82-5.64 (m, 2 H), 5.44 (dd,  $J$



= 15.9 Hz, 0.8 Hz, 1 H), 5.32 (dd,  $J$  = 15.9, 6.7 Hz, 1 H), 5.01-4.89 (m, 4 H), 4.66 (d,  $J$  = 2.6 Hz, 1 H), 4.20 (br s, 1 H), 3.68 (dd,  $J$  = 7.8, 6.3 Hz, 1 H), 2.80 (app hex,  $J$  = 6.7 Hz, 1 H), 2.13-2.03 (m, 1 H), 2.02-1.94 (m, 1 H), 1.93-1.78 (m, 3 H), 1.64-1.53 (m, 1 H), 1.49-1.36 (m, 1 H), 1.09 (s, 3 H), 1.07 (d,  $J$  = 6.9 Hz, 3 H), 1.03-0.92 (m, 27 H), 0.80-0.71 (m, 6 H), 0.64-0.55 (m, 6 H);  $^{13}\text{C}$  NMR (100 MHz,  $\text{CDCl}_3$ )  $\delta$  209.2, 143.3, 137.4, 135.5, 131.6, 115.9, 112.5, 84.8, 84.1, 81.5, 79.4, 40.4, 39.1, 36.3, 34.6, 34.5, 26.2, 24.4, 24.1, 20.0, 18.1, 17.0, 7.0, 6.8, 5.0, 4.9; IR (neat)  $\nu$  3078, 2957, 2911, 2876, 1733, 1640, 1459, 1415, 1372, 1330, 1239, 1170, 1095, 1006, 976, 912, 836, 742, 683; HRMS (ESI) found 615.4268  $[\text{M} + \text{Na}]^+$ , calcd 615.4241 for  $\text{C}_{34}\text{H}_{64}\text{Si}_2\text{O}_4\text{Na}^+$ .

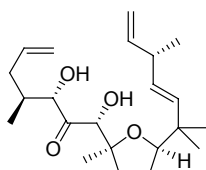

(no compound number was assigned in the manuscript)

**Hydroxy ketone.** A 10 mL round bottom flask was charged with the TES ketone (205 mg, 346  $\mu\text{mol}$ ) and 3 mL of anhydrous THF. After cooling to 0°C TBAF (298 mg, 944  $\mu\text{mol}$ ) in 3 mL of dry THF was added, and after 30 minutes the reaction was stopped by direct filtration of the mixture (silica gel; hexanes/EtOAc, 10:1) to furnish the desired hydroxyl ketone, 125 mg (343  $\mu\text{mol}$ , 99%), as an oil.

Data are: tlc  $R_f$  = 0.32 (hexanes/EtOAc, 10:1);  $[\alpha]_{\text{D}}^{20}$  = -64.1° ( $c$  1,  $\text{CHCl}_3$ );  $^1\text{H}$  NMR (400 MHz,  $\text{CDCl}_3$ )  $\delta$  5.76 (ddd,  $J$  = 17.2, 10.4, 6.7 Hz, 1 H), 5.74-5.63 (m, 1 H), 5.37 (dd,  $J$  = 15.8 Hz, 5.6 Hz, 1 H), 5.31 (d,  $J$  = 15.8 Hz, 1 H), 5.06-4.91 (m, 4 H), 4.49 (d,  $J$  = 6.2 Hz, 1 H), 4.31 (br s, 1 H), 4.15 (br s, 1 H), 3.81 (t,  $J$  = 7.0 Hz, 1 H), 3.18 (d,  $J$  = 6.2 Hz, 1 H), 2.81 (app hex,  $J$  = 6.6 Hz, 1 H), 2.22-2.12 (m, 1 H), 2.10-2.02 (m, 1 H), 2.02-1.92 (m, 1 H), 1.89-1.77 (m, 2 H), 1.68-1.52 (m, 2 H), 1.30 (s, 3 H), 1.08 (d,  $J$  = 6.9 Hz, 3 H), 1.02 (d,  $J$  = 6.9 Hz, 3 H), 0.98 (s, 3 H), 0.92 (s, 3 H),  $^{13}\text{C}$  NMR (100 MHz,  $\text{CDCl}_3$ )  $\delta$  216.0, 142.9, 136.9, 134.2, 132.9, 116.4, 112.8, 86.4, 85.6, 79.8, 78.4, 40.4, 38.8, 37.2, 35.3, 32.0, 25.3, 24.8, 23.6, 23.3, 19.9, 16.5; IR (neat)  $\nu$  3459, 3078, 2969, 2932, 2873, 1709, 1640, 1456, 1374, 1265, 1123, 1071, 1022, 995, 913, 851; HRMS (ESI) found 387.2521  $[\text{M} + \text{Na}]^+$ , calcd 387.2511 for  $\text{C}_{22}\text{H}_{36}\text{O}_4\text{Na}^+$ .

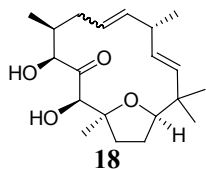

**Trans olefin 18.** A 500 mL round bottom flask with a reflux condenser was charged with the deprotected hydroxyl ketone (125 mg, 343  $\mu\text{mol}$ ) and 200 mL of anhydrous  $\text{CH}_2\text{Cl}_2$ . Then Grubbs II catalyst (27.8 mg, 32.7  $\mu\text{mol}$ ) was added and the reaction was refluxed over 1.5 h before cooling to room temperature. The solution was saturated with air and silica gel (400 mg) was added. After

concentration the resulting solid was purified by flash column chromatography (hexanes/EtOAc, 10:1) to afford the macrocycle **18**, 98 mg (290  $\mu\text{mol}$ , 85%), as an oil ( $E:Z$   $\approx$  5:1).

Data are: tlc  $R_f$  = 0.13 (hexanes/EtOAc, 10:1);  $[\alpha]_{\text{D}}^{20}$  = +48.2° ( $c$  1,  $\text{CHCl}_3$ );  $^1\text{H}$  NMR (400 MHz,  $\text{CDCl}_3$ )  $\delta$  5.40 (dd,  $J$  = 15.5, 8.8 Hz, 1 H), 5.33 (d,  $J$  = 15.4 Hz, 1 H), 5.27 (dd,  $J$  = 15.4 Hz, 7.9 Hz, 1 H), 5.24-5.16 (m, 1 H), 4.57 (br s, 1 H), 4.35 (br s, 1 H), 3.81 (dd,  $J$  = 8.0, 3.0 Hz, 1 H), 3.54 (br s, 1 H), 2.80-2.67 (m, 2 H), 2.57-2.47 (m, 1 H), 2.09-1.97 (m, 2 H), 1.95-1.74 (m, 4 H), 1.17 (d,  $J$  = 7.0 Hz, 3 H), 1.09 (s, 3 H), 1.05 (s, 3 H), 1.03 (d,  $J$  = 6.7 Hz, 3 H), 0.88 (s, 3 H);  $^{13}\text{C}$  NMR (100 MHz,  $\text{CDCl}_3$ )  $\delta$  212.4, 137.2, 133.8, 132.7, 127.8, 88.2, 85.4, 81.8, 77.9, 42.0, 40.3, 39.6, 34.6, 32.3, 26.7, 25.7, 24.2, 21.3, 21.0, 20.4; IR (neat)  $\nu$  3477, 2961, 2930, 2871, 1707, 1454, 1374, 1327, 1239, 1156, 1121, 1074, 1059, 1024, 982, 910, 883, 829, 769, 726, 666; HRMS (ESI) found 359.2202  $[\text{M} + \text{Na}]^+$ , calcd 359.2198 for  $\text{C}_{20}\text{H}_{32}\text{O}_4\text{Na}^+$ .

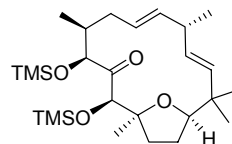

(no compound number was assigned in the manuscript)

**TMS olefin.** A 25 mL round bottom flask was charged with olefin **18** (28 mg, 83.2  $\mu\text{mol}$ ) and 10 mL of anhydrous DMF. The solution was cooled to 0°C before  $\text{NEt}_3$  (80  $\mu\text{L}$ , 58.4 mg, 577  $\mu\text{mol}$ ) and TMS-Cl (50  $\mu\text{L}$ , 43 mg, 395  $\mu\text{mol}$ ) were added consecutively. After 1 h saturated  $\text{NH}_4\text{Cl}$  solution (5 mL) was added, followed by  $\text{H}_2\text{O}$  (15 mL) and hexanes/EtOAc (10:1; 30 mL). The organic layer was washed twice with  $\text{H}_2\text{O}$  (20 mL), and the combined aqueous phases were reextracted once with hexanes/EtOAc (10:1; 20 mL). Then, the organic solutions were combined, dried over  $\text{Na}_2\text{SO}_4$  and concentrated under reduced pressure. A short filtration over silica gel (hexanes/EtOAc, 10:1) afforded the TMS-protected diol, 39.8 mg (82.8  $\mu\text{mol}$ , >99%), as an oil.

Data are: tlc  $R_f$  = 0.67 (hexanes/EtOAc, 10:1);  $[\alpha]_{\text{D}}^{20}$  = -23.4° ( $c$  0.5,  $\text{CHCl}_3$ );  $^1\text{H}$  NMR (400 MHz,  $\text{CDCl}_3$ )  $\delta$  5.54-5.24 (m, 4 H), 4.75-4.63 (m, 1 H), 4.50 (br d,  $J$  = 1.8 Hz, 1 H), 3.62 (br t,  $J$  = 6.0 Hz, 1 H), 2.74 (app hex,  $J$  = 6.5 Hz, 1 H), 2.52-2.33 (m, 1 H), 2.13-1.98 (m, 1 H), 1.96-1.66 (m, 4 H), 1.64-1.46 (m, 1 H), 0.87 (s, 3 H), 1.08-0.98 (m, 12 H), 0.18 (s, 9 H), 0.12 (s, 9 H),  $^{13}\text{C}$  NMR (100 MHz,  $\text{CDCl}_3$ )  $\delta$  136.7, 134.6, 132.3, 127.3, 87.2, 86.4, 85.6, 78.3, 40.2, 39.0, 34.0, 32.1, 26.3, 26.1, 24.9, 24.6, 21.9, 20.1, 15.5, 0.7, 0.1, C=O was not observed, the NMR spectra display a strong line broadening due to a slow conformational equilibrium; IR (neat)  $\nu$  2960, 2871, 1727, 1453, 1371, 1305, 1251, 1099, 1051, 1027, 999, 980, 880, 842, 753; HRMS (ESI) found 503.2986  $[\text{M} + \text{Na}]^+$ , calcd 503.2989 for  $\text{C}_{26}\text{H}_{48}\text{O}_4\text{Si}_2\text{Na}^+$ .

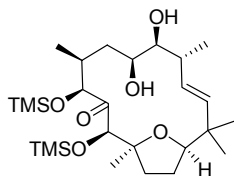

(no compound number was assigned in the manuscript)

**TMS diol.** A 10 mL round bottom flask was charged with the TMS ether of **18** (62 mg, 129  $\mu$ mol), *t*BuOH (4 mL) and H<sub>2</sub>O (4 mL). Then  $\alpha$ -DHQ-CLB (21.8 mg, 46.9  $\mu$ mol), K<sub>2</sub>CO<sub>3</sub> (55.5 mg, 402  $\mu$ mol), K<sub>3</sub>Fe(CN)<sub>6</sub> (129 mg, 392  $\mu$ mol) and MSA (37 mg, 389  $\mu$ mol) were added consecutively. When the mixture became a clear the solution was cooled to 0°C and an OsO<sub>4</sub> solution (2.5 wt-% in *t*BuOH, 162  $\mu$ L, 131 mg, 12.9  $\mu$ mol) was introduced dropwise. After 2.5 h the reaction was terminated by addition of an half-saturated aqueous Na<sub>2</sub>S<sub>2</sub>O<sub>3</sub> solution. The mixture was extracted with CH<sub>2</sub>Cl<sub>2</sub> (3 x 5 mL), and the combined organic phases were dried over Na<sub>2</sub>SO<sub>4</sub> and concentrated under reduced pressure. Flash chromatography (hexanes/EtOAc, 5:1) afforded the title compound, 55 mg (107  $\mu$ mol, 83%), as an oil.

Data are: tlc  $R_f$  = 0.17 (hexanes/EtOAc, 5:1);  $[\alpha]_D^{20}$  = +4.8°,  $[\alpha]_{365}^{20}$  = -12.0° (*c* 1, CHCl<sub>3</sub>); <sup>1</sup>H NMR (400 MHz, CDCl<sub>3</sub>)  $\delta$  5.49 (d, *J* = 15.8 Hz, 1 H), 5.12 (dd, *J* = 15.8, 9.2 Hz, 1 H), 4.65 (br s, 1 H), 4.29 (br s, 1 H), 3.67 (br s, 1 H), 3.56 (dd, *J* = 9.6, 5.6 Hz, 1 H), 3.15 (br t, *J* = 9.6 Hz, 1 H), 2.40-2.20 (m, 2 H), 2.00-1.88 (m, 2 H), 1.88-1.62 (m, 4 H), 1.51-1.41 (m, 1 H), 1.18 (s, 3 H), 1.11 (s, 3 H), 1.08 (d, *J* = 6.7 Hz, 3 H), 0.98 (d, *J* = 6.5 Hz, 3 H), 0.88 (s, 3 H), 0.16 (s, 9 H), 0.13 (s, 9 H), <sup>13</sup>C NMR (100 MHz, CDCl<sub>3</sub>)  $\delta$  136.3, 131.6, 86.3, 84.1, 77.6, 77.2, 74.6, 68.7, 40.6, 38.1, 35.6, 34.0, 31.2, 27.5, 26.0, 25.5, 25.4, 18.2, 16.6, 0.4, 0.3, C=O signal was not detected because the NMR spectra display a strong line broadening for which we make a slow conformational equilibrium responsible; IR (neat)  $\nu$  3424, 2960, 2872, 1726, 1453, 1372, 1251, 1097, 1049, 997, 925, 878, 842, 754; HRMS (ESI) found 537.3060 [M + Na]<sup>+</sup>, calcd 537.3044 for C<sub>26</sub>H<sub>50</sub>O<sub>6</sub>Si<sub>2</sub>Na<sup>+</sup>.

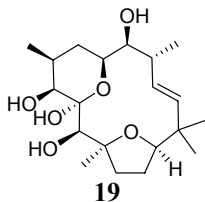

**Triol 19.** A 5 mL round bottom flask was charged with the protected dihydroxylated product (17.7 mg, 34.4  $\mu$ mol) and 1 mL of dry THF. The solution was cooled to 0°C before a solution of TBAF (13.2 mg, 41.8  $\mu$ mol) in 0.5 mL of dry THF was added. After 10 minutes the complete mixture was directly filtered over a short plug of silica gel (hexanes/EtOAc, 1:1) and the resulting solution was concentrated under reduced pressure. The colourless oil was dried in vacuum to afford the title compound, 12.7 mg (34.3  $\mu$ mol, >99%).

Data are: tlc  $R_f$  = 0.17 (hexanes/EtOAc, 1:1), 0.27 (EtOAc);  $[\alpha]_D^{20}$  = +30.6° (*c* 0.5, MeOH); <sup>1</sup>H NMR (400 MHz, d<sub>4</sub>-MeOH)  $\delta$  5.49 (d, *J* = 15.3 Hz, 1 H), 5.36 (dd, *J* = 15.3, 9.3

Hz, 1 H), 4.12 (dt, *J* = 12.3, 2.3 Hz, 1 H), 3.86 (dd, *J* = 7.8, 6.2 Hz, 1 H), 3.72 (br s, 1 H), 3.34 (d, *J* = 2.4 Hz, 1 H), 3.27 (dd, *J* = 6.3, 2.3 Hz, 1 H), 2.35-2.15 (m, 3 H), 2.08-1.92 (m, 2 H), 1.74 (q, *J* = 12.3 Hz, 1 H), 1.61 (ddd, *J* = 12.2, 7.2, 5.1 Hz, 1 H), 1.31 (s, 3 H), 1.13-1.04 (m, 1 H), 1.09 (d, *J* = 7.0 Hz, 3 H), 1.07 (s, 3 H), 0.94 (d, *J* = 7.0 Hz, 3 H), 0.92 (s, 3 H), <sup>1</sup>H NMR (500 MHz, CDCl<sub>3</sub>)  $\delta$  5.45 (d, *J* = 15.4 Hz, 1 H), 5.31 (dd, *J* = 15.4, 9.2 Hz, 1 H), 4.56 (br s, 1 H), 4.12 (dt, *J* = 12.1, 2.1 Hz, 1 H), 3.88 (bs, 1 H), 3.81 (t, *J* = 7.2 Hz, 1 H), 3.67 (br s, 1 H), 3.40 (bs, 1 H), 3.27 (bd, *J* = 4.6 Hz, 1 H), 2.39-2.26 (m, 3 H), 1.98-1.84 (m, 2 H), 1.74 (ps q, *J* = 12.9 Hz, 1 H), 1.66-1.54 (m, 2 H), 1.30 (s, 3 H), 1.22-1.14 (m, 1 H), 1.11 (d, *J* = 7.0 Hz, 3 H), 1.08 (s, 3 H), 0.97 (d, *J* = 7.0 Hz, 3 H), 0.91 (s, 3 H), <sup>13</sup>C NMR (100 MHz, d<sub>4</sub>-MeOH)  $\delta$  136.0, 131.6, 98.6, 89.46, 89.44, 81.4, 79.5, 76.1, 70.5, 46.7, 39.8, 35.6, 31.0, 30.2, 27.9, 26.8, 26.6, 24.7, 21.5, 17.8; IR (neat)  $\nu$  3348, 2963, 2927, 2870, 1719, 1665, 1611, 1547, 1455, 1369, 1286, 1225, 1120, 1098, 1059, 1024, 991, 870, 778, 702; HRMS (ESI) found 393.2260 [M + Na]<sup>+</sup>, calcd 393.2253 for C<sub>20</sub>H<sub>34</sub>O<sub>6</sub>Na<sup>+</sup>.

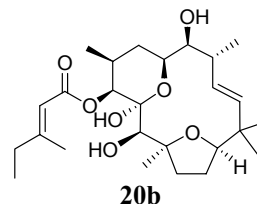

**20b.** A 5 mL round bottom flask was charged with **19** (5.5 mg, 14.8  $\mu$ mol), the side chain (25.2 mg, 221  $\mu$ mol) and 1.2 mL of dry CH<sub>2</sub>Cl<sub>2</sub>. DIC (33  $\mu$ L, 26.9 mg, 213  $\mu$ mol) was added via syringe, followed by DMAP (2.1 mg, 17.2  $\mu$ mol) after 1h. The reaction mixture was allowed to stir for 28h at room temperature and then directly filtered over silica gel (hexanes/EtOAc, 1:1). The resulting filtrate was reduced and purified by flash column chromatography (hexanes/EtOAc, 10:1  $\rightarrow$  5:1  $\rightarrow$  2.5:1) to afford **20b** and **20c**, 4.8 mg (70%), as an oil and inseparable, along with **20a**, 1.5 mg (22%), as an oil. **20a** was fully characterized, but tends to spontaneously rearrange to the desired **20b**, thereby furnishing **20b** as pure material. **20c** was obtained as sole product under Yamaguchi conditions, so that the following spectroscopical data for **20a-c** were all recorded for pure samples.

Data are (**20b**): tlc  $R_f$  = 0.63 (hexanes/EtOAc, 1:1);  $[\alpha]_D^{20}$  = +16.3° (*c* 0.08, CHCl<sub>3</sub>); <sup>1</sup>H NMR (400 MHz, CDCl<sub>3</sub>)  $\delta$  6.22 (s, 1 H), 5.70 (q, *J* = 1.2 Hz, 1 H), 5.50 (d, *J* = 15.3 Hz, 1 H), 5.28 (dd, *J* = 15.3, 9.3 Hz, 1 H), 4.92 (d, *J* = 2.5 Hz, 1 H), 4.20 (dt, *J* = 12.0, 2.3 Hz, 1 H), 3.70 (dd, *J* = 9.5, 5.9 Hz, 1 H), 3.46 (d, *J* = 6.4 Hz, 1 H), 3.38 (ddd, *J* = 8.5, 6.3, 2.3 Hz, 1 H), 3.07 (d, *J* = 6.4 Hz, 1 H), 2.48-2.27 (m, 3 H), 2.24-2.11 (m, 5 H), 1.94-1.83 (m, 1 H), 1.82-1.72 (m, 2 H), 1.49 (ddd, *J* = 12.4, 9.9, 7.3 Hz, 1 H), 1.32 (s, 3 H), 1.20-1.16 (m, 1 H), 1.12 (d, *J* = 7.0 Hz, 3 H), 1.10 (s, 3 H), 1.07 (t, *J* = 7.5 Hz, 3 H), 0.90 (s, 3 H), 0.84 (d, *J* = 6.9 Hz, 3 H); <sup>13</sup>C NMR (100 MHz, CDCl<sub>3</sub>)  $\delta$  166.6, 135.0, 130.4, 114.1, 96.8, 88.0, 87.9, 78.3, 78.1, 73.5, 68.4, 45.5, 38.4, 36.2, 33.9, 30.0, 29.1, 28.0, 27.3, 26.0, 25.2, 20.9, 19.0, 17.3, 11.9, C-3' was not detected; IR (neat)  $\nu$  3354, 2969, 2925,

2855, 1741, 1670, 1653, 1456, 1374, 1261, 1227, 1216, 1144, 1074, 1023, 798, 696; HRMS (ESI) found 489.2840  $[M + Na]^+$ , calcd 489.2828 for  $C_{26}H_{42}O_7Na^+$ .

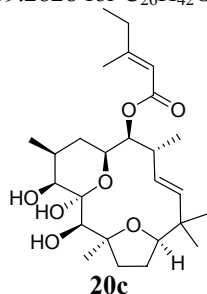

Data are (**20c**): tlc  $R_f$  = 0.59 (hexanes/EtOAc, 1:1);  $[\alpha]_D^{20}$  = +25.2° (*c* 0.25,  $CHCl_3$ );  $^1H$  NMR (400 MHz,  $CDCl_3$ )  $\delta$  6.14 (s, 1 H), 5.72 (q,  $J$  = 1.2 Hz, 1 H), 5.54 (d,  $J$  = 15.3 Hz, 1 H), 5.33 (dd,  $J$  = 15.3, 9.4 Hz, 1 H), 4.92 (dd,  $J$  = 7.7, 3.1 Hz, 1 H), 4.31 (dt,  $J$  = 11.9, 3.1 Hz, 1 H), 3.75 (dd,  $J$  = 9.0, 6.0 Hz, 1 H), 3.68-3.63 (m, 1 H), 3.32 (br s, 1 H), 2.51-2.39 (m, 2 H), 2.25-2.13 (m, 4 H), 2.18 (d,  $J$  = 1.2 Hz, 3 H), 1.97-1.73 (m, 4 H), 1.34 (s, 3 H), 1.30-1.21 (m, 1 H), 1.12 (s, 3 H), 1.10 (t,  $J$  = 7.5 Hz, 3 H), 1.01 (d,  $J$  = 6.9 Hz, 3 H), 0.93 (d,  $J$  = 6.9 Hz, 3 H), 0.90 (s, 3 H), the  $^1H$  NMR spectrum shows slightly broadened signals for which we make conformational equilibrium responsible;  $^{13}C$  NMR (100 MHz,  $CDCl_3$ )  $\delta$  166.9, 162.5, 135.6, 129.7, 114.3, 97.1, 88.1, 87.9, 79.1, 77.2, 77.9, 68.4, 42.3, 38.5, 36.0, 33.9, 29.3, 28.4, 27.9, 27.3, 25.8, 24.8, 20.6, 18.9, 17.3, 11.9; IR (neat)  $\nu$  3500, 3351, 2963, 2926, 2872, 1713, 1648, 1456, 1375, 1261, 1217, 1144, 1099, 1070, 1034, 995, 866, 761; HRMS (ESI) found 489.2830  $[M + Na]^+$ , calcd 489.2828 for  $C_{26}H_{42}O_7Na^+$ .

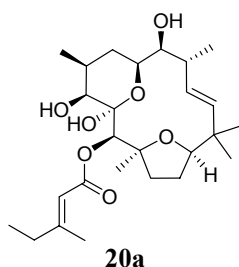

Data are (**20a**): tlc  $R_f$  = 0.32 (hexanes/EtOAc, 1:1);  $[\alpha]_D^{20}$  = +4.5°,  $[\alpha]_{365nm}^{20}$  = +30.7° (*c* 0.31,  $CHCl_3$ );  $^1H$  NMR (400 MHz,  $CDCl_3$ )  $\delta$  5.83 (s, 1 H), 5.64 (q,  $J$  = 1.3 Hz, 1 H), 5.46 (d,  $J$  = 15.8 Hz, 1 H), 5.33 (dd,  $J$  = 15.8, 8.2 Hz, 1 H), 5.18 (s, 1 H), 4.09 (dd,  $J$  = 12.4, 2.2 Hz, 1 H), 3.78 (t,  $J$  = 7.3 Hz, 1 H), 3.41 (dd,  $J$  = 8.3, 2.2 Hz, 1 H), 3.29 (br s, 1 H), 3.11-2.97 (br s, 1 H), 2.45-2.32 (m, 1 H), 2.27-2.14 (m, 6 H), 2.11-1.99 (m, 1 H), 1.94-1.76 (m, 3 H), 1.71-1.63 (m, 2 H), 1.25 (s, 3 H), 1.11 (s, 3 H), 1.08 (t,  $J$  = 7.5 Hz, 3 H), 1.03 (d,  $J$  = 7.2 Hz, 3 H), 0.95 (s, 3 H), 0.92 (d,  $J$  = 6.9 Hz, 3 H);  $^{13}C$  NMR (100 MHz,  $CDCl_3$ )  $\delta$  166.0, 163.9, 133.7, 131.6, 113.9, 98.0, 87.8, 86.2, 78.1, 77.2, 73.8, 66.9, 43.3, 38.4, 35.3, 33.9, 30.7, 29.9, 27.2, 26.8, 25.78, 25.75, 19.4, 19.0, 17.3, 11.9; IR (neat)  $\nu$  3366, 2962, 2924, 2872, 2854, 1716, 1649, 1458, 1377, 1274, 1218, 1142, 1097, 1072, 1029, 994, 865; HRMS (ESI) found 489.2837  $[M + Na]^+$ , calcd 489.2828 for  $C_{26}H_{42}O_7Na^+$ .

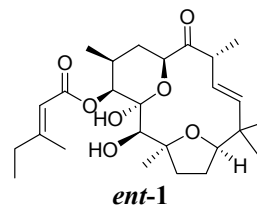

**ent-1.** A 5 mL round bottom flask was charged with **20b/20c** (3.2 mg, 6.86  $\mu$ mol), powdered 4Å molecular sieve (12 mg), NMO (10 mg, 85.5  $\mu$ mol) and 1 mL of dry  $CH_2Cl_2$ . TPAP (1 mg, 2.85  $\mu$ mol) was added and the reaction was stirred at room temperature for 1 h. Then the mixture was cautiously reduced and directly purified by flash column chromatography (hexanes/EtOAc, 10:1) to afford **ent-1**, 1.4 mg (3.0  $\mu$ mol, 44%), as an oil, and the product of **20c** oxidation, 1.3 mg (2.80  $\mu$ mol, 41%), as an oil.

Data are (**ent-1**): tlc  $R_f$  = 0.66 (hexanes/EtOAc, 2.5:1);  $[\alpha]_D^{20}$  = -119.0° (*c* 0.056,  $CHCl_3$ );  $^1H$  NMR (400 MHz,  $CDCl_3$ )  $\delta$  5.86 (d,  $J$  = 15.3 Hz, 1 H), 5.70 (q,  $J$  = 1.3 Hz, 1 H), 5.66 (s, 1 H), 5.24 (dd,  $J$  = 15.3, 9.7 Hz, 1 H), 4.90 (d,  $J$  = 2.6 Hz, 1 H), 4.63 (dd,  $J$  = 11.8, 2.9 Hz, 1 H), 3.77 (dd,  $J$  = 11.3, 5.1 Hz, 1 H), 3.43 (d,  $J$  = 6.4 Hz, 1 H), 3.34 (dq,  $J$  = 9.7, 6.8 Hz, 1 H), 3.11 (d,  $J$  = 6.4 Hz, 1 H), 2.44 (dd,  $J$  = 12.7, 7.2 Hz, 1 H), 2.38-2.29 (m, 1 H), 2.21 (q,  $J$  = 7.6 Hz, 2 H), 2.16 (d,  $J$  = 1.3 Hz, 3 H), 2.09-1.97 (m, 1 H), 1.85 (ddd,  $J$  = 13.6, 3.9, 2.9 Hz, 1 H), 1.77 (ddd,  $J$  = 12.0, 7.2, 5.1 Hz, 1 H), 1.58-1.51 (m, 1 H), 1.41-1.36 (m, 1 H), 1.36 (s, 3 H), 1.14 (s, 3 H), 1.12 (d,  $J$  = 6.8 Hz, 3 H), 1.07 (t,  $J$  = 7.6 Hz, 3 H), 0.91 (s, 3 H), 0.85 (d,  $J$  = 6.9 Hz, 3 H);  $^{13}C$  NMR (100 MHz,  $CDCl_3$ )  $\delta$  211.3, 166.6, 162.9, 140.1, 126.9, 113.9, 97.2, 88.9, 87.7, 78.3, 74.2, 73.2, 49.6, 38.8, 37.4, 33.9, 29.1, 28.9, 28.14, 28.10, 25.5, 25.1, 19.0, 17.0, 16.0, 11.9; IR (neat)  $\nu$  3368, 2956, 2924, 2854, 1717, 1649, 1460, 1379, 1260, 1215, 1142, 1098, 1073, 1024, 980, 852, 795, 701; HRMS (ESI) found 487.2693  $[M + Na]^+$ , calcd 487.2672 for  $C_{26}H_{40}O_7Na^+$ .

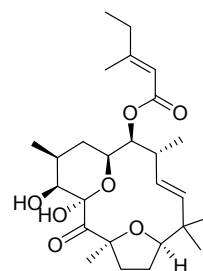

Data are (**20c** oxidized product): tlc  $R_f$  = 0.58 (hexanes/EtOAc, 2.5:1);  $[\alpha]_D^{20}$  = -16.0°,  $[\alpha]_{365nm}^{20}$  = -185.6° (*c* 0.063,  $CHCl_3$ );  $^1H$  NMR (400 MHz,  $CDCl_3$ )  $\delta$  6.25 (s, 1 H), 5.77 (br s, 1 H), 5.48 (d,  $J$  = 15.2 Hz, 1 H), 5.40 (dd,  $J$  = 15.2, 9.1 Hz, 1 H), 4.93 (dd,  $J$  = 7.8, 2.8 Hz, 1 H), 4.32 (dt,  $J$  = 12.3, 2.8 Hz, 1 H), 3.96 (t,  $J$  = 7.2 Hz, 1 H), 3.86 (br s, 1 H), 3.53 (br s, 1 H), 2.54-2.46 (m, 1 H), 2.34 (dq,  $J$  = 12.5, 8.1 Hz, 1 H), 2.22-2.16 (m, 1 H), 2.17 (q,  $J$  = 7.4 Hz, 1 H), 2.14 (br s, 3 H), 2.03-1.92 (m, 2 H), 1.81 (ddd,  $J$  = 12.5, 7.5, 5.7 Hz, 1 H), 1.63 (q,  $J$  = 12.3 Hz, 1 H), 1.42 (s, 3 H), 1.18 (s, 3 H), 1.14-1.08 (m, 1 H), 1.08 (t,  $J$  = 7.4 Hz, 3 H), 1.00 (d,  $J$  = 6.9 Hz, 3 H), 0.97 (d,  $J$  =

6.9 Hz, 3 H), 0.94 (s, 3 H) ;  $^{13}\text{C}$  NMR (125 MHz,  $\text{CDCl}_3$ )  $\delta$  208.7, 167.1, 162.2, 135.1, 130.0, 114.4, 97.0, 91.1, 89.2, 76.9, 70.9, 68.8, 41.7, 38.7, 36.1, 33.8, 29.2, 28.5, 26.0, 25.2, 24.42, 24.39, 20.4, 18.9, 17.3, 11.9; IR (neat)  $\nu$  3360, 2962, 2926, 2872, 1714, 1650, 1457, 1377, 1311, 1263, 1216, 1143, 1095, 1030, 995, 977, 866, 803; HRMS (ESI) found 487.2683  $[\text{M} + \text{Na}]^+$ , calcd 487.2672 for  $\text{C}_{26}\text{H}_{40}\text{O}_7\text{Na}^+$ .
